# Supplementary material
Source: Springer Nature journal article supplement (https://www.springermedizin.de/resource/supplementary/13054_2013_2485_MOESM2_ESM.pdf/9714136)
Supplement: MOESM2 [file 9714136]

### 60-day survival rate

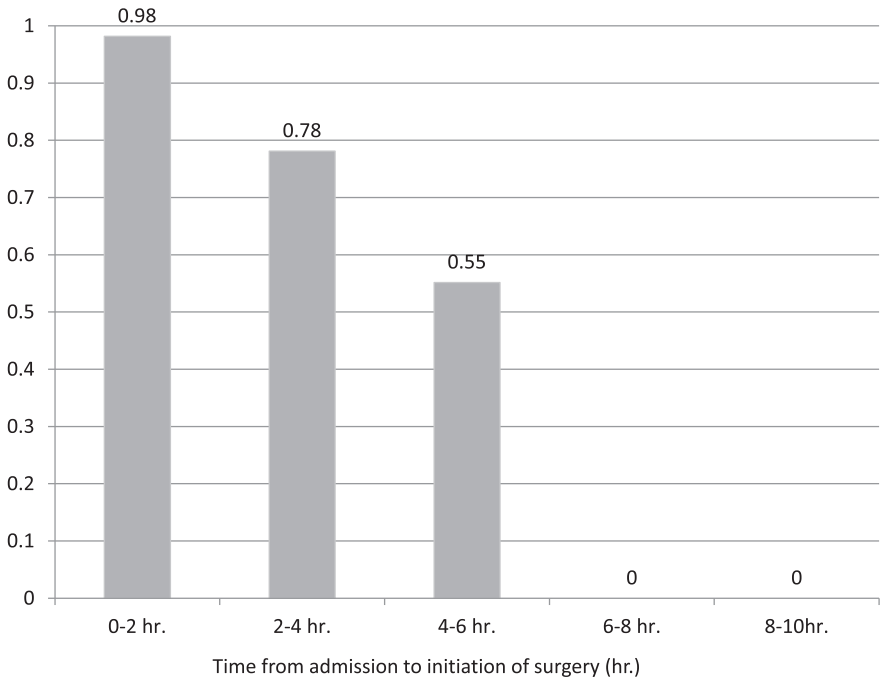

| Time from admission to initiation of surgery (hr.) | No. of 60-day survivors | No. of 60-day non-survivors |
|----------------------------------------------------|-------------------------|-----------------------------|
| 0 hr. < time ≤ 2 hr.                               | 54                      | 1                           |
| 2 hr. < time ≤ 4 hr.                               | 50                      | 14                          |
| 4 hr. < time ≤ 6 hr.                               | 16                      | 13                          |
| 6 hr. < time ≤ 8 hr.                               | 0                       | 5                           |
| 8 hr. < time ≤ 10 hr.                              | 0                       | 1                           |
